# Supplementary material for: Integration of pharmacophore mapping and molecular docking in sequential virtual screening: towards the discovery of novel JAK2 inhibitors
Source: Royal Society of Chemistry journal article supplement (doi:10.1039/c6ra24959k), 2017-01-01
Supplement: c6ra24959k1.pdf [file c6ra24959k1.pdf]

**Electronic Supplementary Information**

**Integration of Pharmacophore Mapping and Molecular Docking in Sequential Virtual Screening: toward the Discovery of Novel JAK2 Inhibitors**

Ting-Ting Yao,<sup>a,b,+</sup> Jiang-Feng Xie<sup>+,a</sup>, Xing-Guo Liu,<sup>c</sup> Jing-Li Cheng,<sup>b</sup> Cheng-Yuan Zhu,<sup>a</sup> Jin-Hao Zhao,<sup>a,b,\*</sup> Xiao-Wu Dong<sup>a,\*</sup>

<sup>a</sup>ZJU-ENS Joint Laboratory of Medicinal Chemistry, Zhejiang Province Key Laboratory of Anti-Cancer Drug Research, College of Pharmaceutical Sciences, Zhejiang University, Hangzhou, 310058, P. R. China

<sup>b</sup>Institute of Pesticide and Environmental Toxicology, Ministry of Agriculture Key Laboratory of Agricultural Entomology, Zhejiang University, Hangzhou 310029, P. R. China

<sup>c</sup>School of Chemical Engineering and Light Industry, Guangdong University of Technology, Guangzhou, 510006, P.R. China

\*Correspondence and requests for materials should be addressed to Jin-Hao Zhao (email: [jinhaozhao@zju.edu.cn](mailto:jinhaozhao@zju.edu.cn)) and Xiao-Wu Dong (email: [dongxw@zju.edu.cn](mailto:dongxw@zju.edu.cn)).

<sup>+</sup> These authors contributed equally to this work.

## Contents

### **A. Figures**

**Figure S1.** Chemical structures of all 15 training set molecules used for HypoGen pharmacophore generation.....S3

**Figure S2.** Chemical structures of all 9 test set molecules.....S3

### **B. Tables**

**Table S1.** Information of statistical significance and predictive power presented in cost values for top 10 hypothesis.....S4

**Table S2.** The corresponding Specs ID, docking score, FitValue generated by pharmacophore of the virtual screening hits.....S5

**Table S3.** The corresponding Specs ID, structure and similarity to the query structures of the virtual screening hits.....S6

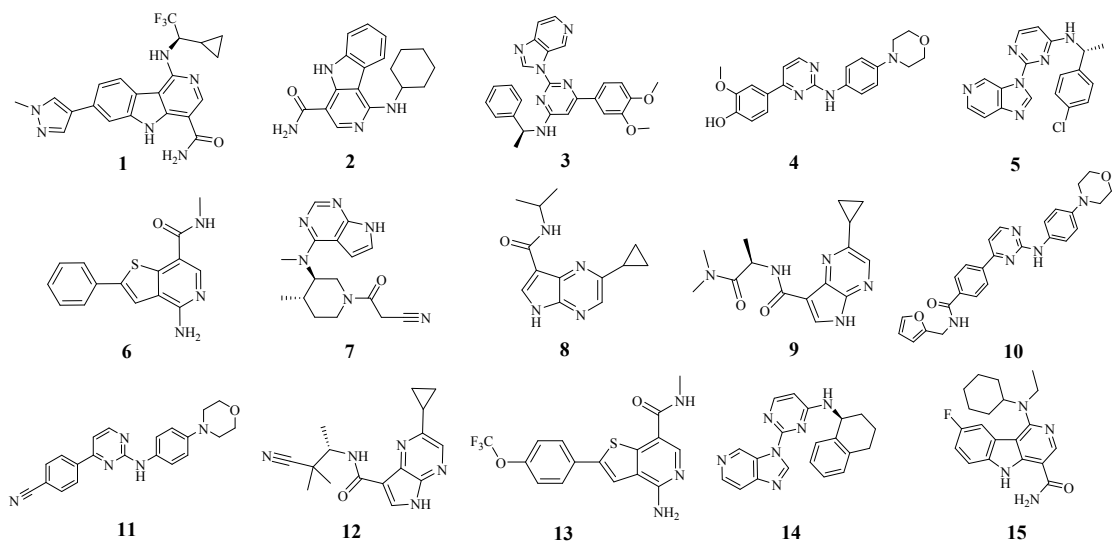

**Figure S1.** Chemical structures of all 15 training set molecules used for HypoGen pharmacophore generation.

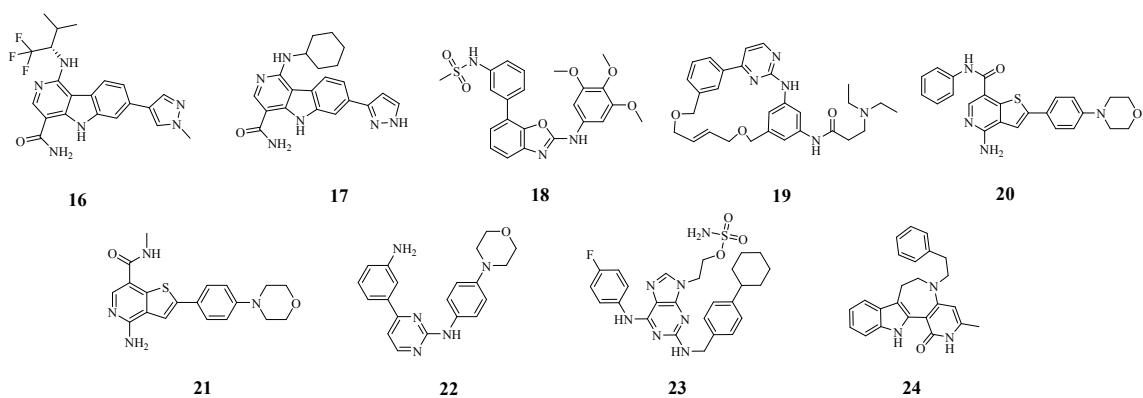

**Figure S2.** Chemical structures of all 9 test set molecules used for HypoGen pharmacophore validation.

**Table S1.** Information of statistical significance and predictive power presented in cost values for top 10 hypothesis

| No. | Total cost | delta Cost | R.m.s deviation | Correlation | Features                         |
|-----|------------|------------|-----------------|-------------|----------------------------------|
| 1   | 73.20      | 73.08      | 1.25            | 0.94        | HBD, HBD, HY, HY, EV, EV, EV, EV |
| 2   | 74.31      | 71.97      | 1.36            | 0.92        | HBD, HBD, HY, HY, EV, EV, EV, EV |
| 3   | 76.28      | 70.00      | 1.46            | 0.91        | HBD, HBD, HY, HY, EV, EV, EV, EV |
| 4   | 88.76      | 57.53      | 1.93            | 0.85        | HBA, HY, HY                      |
| 5   | 91.44      | 54.84      | 2.00            | 0.84        | HBA, HY, HY, EV, EV, EV          |
| 6   | 93.75      | 52.53      | 2.13            | 0.81        | HBA, HBA, HBD, HY                |
| 7   | 94.44      | 51.84      | 2.15            | 0.81        | HBA, HBD, HBD, HY, EV            |
| 8   | 94.49      | 51.79      | 2.11            | 0.82        | HBA, HBA, HBD, EV                |
| 9   | 94.56      | 51.72      | 2.14            | 0.81        | HBD, HBD, HY, HY, EV             |
| 10  | 95.51      | 50.77      | 2.17            | 0.80        | HBD, HBD, HY, HY, EV             |

delta Cost=null cost - total cost; Fixed cost=59.69 bits; Null cost=146.29; Configuration=15.02 bits; HBA=Hydrogen Bond Acceptor; HBD=Hydrogen Bond Donor; HY=Hydrophobic; EV=Excluded Volume.

**Table S2.** The corresponding Specs ID, structure, docking score and FitValue generated by pharmacophore of the virtual screening hits\*

| NO. | ID in Specs     | Structure                                                                           | LigScore1_Dreiding | FitValue |
|-----|-----------------|-------------------------------------------------------------------------------------|--------------------|----------|
| A1  | AO-022/43349386 | 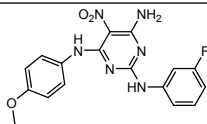   | 4.42               | 7.84     |
| A2  | AO-022/43349135 |    | 4.00               | 7.78     |
| A3  | AJ-292/42284769 |    | 9.00               | 7.76     |
| A4  | AO-022/43452642 |    | 4.27               | 7.50     |
| A5  | AN-584/43416482 |   | 4.23               | 7.46     |
| A6  | AM-807/12426021 |  | 4.10               | 7.34     |
| A7  | AO-022/43356671 |  | 4.21               | 7.01     |
| A8  | AG-670/36572045 |  | 4.17               | 6.98     |
| A9  | AJ-292/42284768 |  | 3.99               | 6.46     |
| A10 | AJ-292/42490236 |  | 4.03               | 5.77     |
| A11 | AJ-292/42226268 |  | 4.61               | 5.74     |
| A12 | AJ-292/42284691 |  | 4.12               | 5.57     |

\* The purity of all compounds purchased from Specs is higher than 95% according to the purity

statements.

**Table S3.** The corresponding Specs ID, structure and similarity to the query structures (A5, A6, A9) of the virtual screening hits\*

| NO. | ID in Specs     | Structure                                                                          | Similarity to query structure (A5, A6, A9) |
|-----|-----------------|------------------------------------------------------------------------------------|--------------------------------------------|
| B1  | AK-777/09836064 | 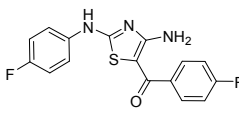  | 0.63                                       |
| B2  | AM-807/12427247 |   | 0.44                                       |
| B3  | AR-434/43295104 |   | 0.37                                       |
| B4  | AM-807/14956082 |   | 0.31                                       |
| B5  | AJ-292/42284682 |  | 0.31                                       |

\* The purity of all compounds purchased from Specs is higher than 95% according to the purity statements.
